# Supplementary material for: RIOK3 and Its Alternatively Spliced Isoform Have Disparate Roles in the Innate Immune Response to Rift Valley Fever Virus (MP12) Infection
Source: MDPI journal article supplement (doi:10.3390/v14092064), 2022-09-17
Supplement: s1 [file s1]

**Table S1.** Sequences of oligonucleotides used. TNF $\alpha$  qPCR primers used were predesigned by Integrated DNA Technologies (IDT) and spanned exons 1b-4a.

| qPCR Primer       | qPCR Primer Sequence              |
|-------------------|-----------------------------------|
| F_IFN $\beta$     | 5'-AAACTCATGAGCAGTCTGCA-3'        |
| R_IFN $\beta$     | 5'-AGGAGATCTTCAGTTTCGGAGG-3'      |
| F_IL-8            | 5'-GGCAGCCTTCCTGATTTCTG-3'        |
| R_IL-8            | 5'-CTTGGCAAACTGCACCTTCA-3'        |
| F_GAPDH           | 5'-GTCTCCTCTGACTTCAACAGCG-3'      |
| R_GAPDH           | 5'-ACCACCCTGTTGCTGTAGCCAA-3'      |
| PCR Primer        | PCR Primer Sequence               |
| RIOK3 Exon 5      | 5'-CCGGTCCCACTCCTAAAAAGGGC-3'     |
| RIOK3 Exon 10     | 5'-CCAGCATGCCACAGCATGTTATACTCA-3' |
| Morpholino Oligo  | Morpholino Oligo Sequence         |
| RIOK3 X2-Inducing | 5'-ATTTTGCTCATTTACCTCCCTCCAT-3'   |
| Standard Control  | 5'-CCTCTTACCTCAGTTACAATTTATA-3'   |

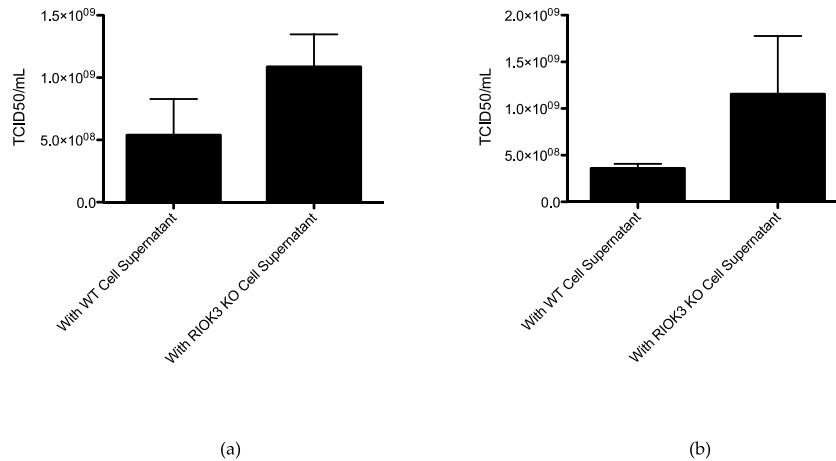

**Figure S1.** Infectious dose of RVFV MP12 in infected WT HEK 293 cells incubated with supernatant from poly(I:C)- or TNF $\alpha$ -treated cells. **(a)** TCID50/mL values of infected cells incubated with supernatant from poly(I:C)-treated WT or RIOK3 KO HEK 293 cells. **(b)** TCID50/mL values of infected cells incubated with supernatant from TNF $\alpha$ -treated WT or RIOK3 KO HEK 293 cells. Plots present the data as the mean value of 3 biological replicates +/- SEM.

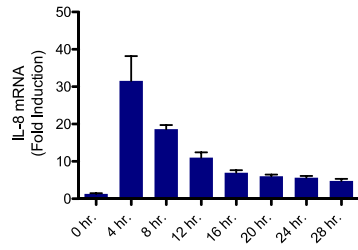

(a)

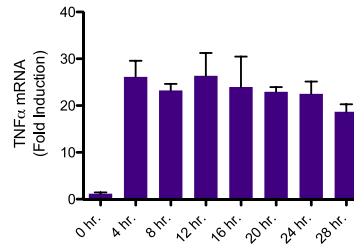

(b)

**Figure S2.** Relative normalized expression of (a) IL-8 and (b) TNFα mRNA in response to TNFα protein. WT HEK 293 cells were treated with 20 ng/mL TNFα and lysed at 4 hr. intervals from 0 to 28 hr. post-treatment. Fold induction is relative to WT cells that were not treated with TNFα. Cells were grown in 12-well plates and seeded at a density  $\sim 0.1 \times 10^6$  cells/well. Plots present the data as the mean value of 3 biological replicates  $\pm$  SEM.

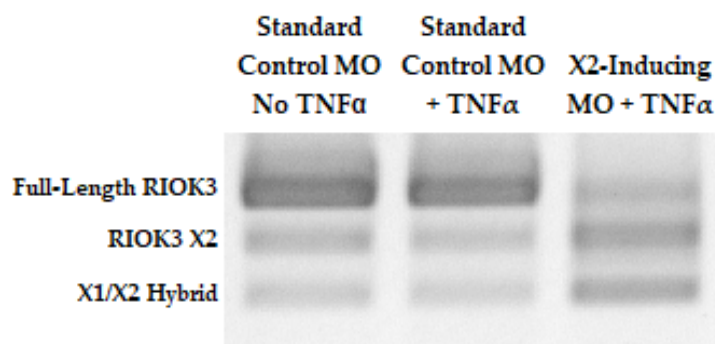

**Figure S3.** Alternative splicing of RIOK3 in standard control MO- vs. X2-inducing MO-treated cells. For information on seeding density, see **Figure 6** caption in the main text.

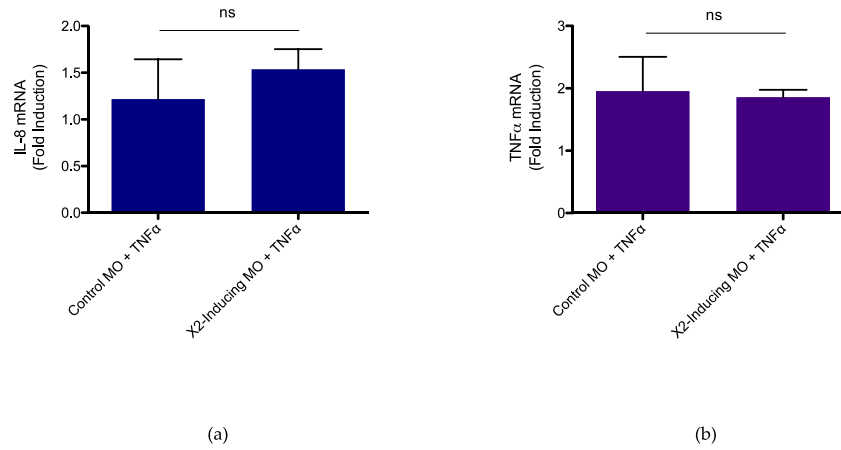

**Figure S4.** Relative normalized expression of (a) IL-8 and (b) TNFα mRNA in RIOK3 KO cells treated with standard control MO vs. X2-inducing MO. Fold induction is relative to values of cells transfected with standard control MO and that were not treated with TNFα. Cells were grown in 12-well plates, seeded at a density  $\sim 0.2 \times 10^6$  cells/well, and treated with 80 ng/mL TNFα.
